# Supplementary material
Source: HighWire-hosted journal article supplement (https://erj.ersjournals.com/content/60/2/2101698)

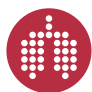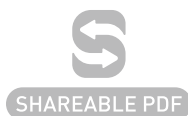

# Targeting peptidyl-prolyl isomerase 1 in experimental pulmonary arterial hypertension

Nabham Rai<sup>1</sup>, Akylbek Sydykov<sup>1</sup>, Baktybek Kojonazarov<sup>1,2</sup>, Jochen Wilhelm<sup>1,2</sup>, Grégoire Manaud<sup>3</sup>, Swathi Veeroju<sup>1</sup>, Clemens Ruppert<sup>1,2</sup>, Frédéric Perros<sup>3</sup>, Hossein Ardeschir Ghofrani<sup>1</sup>, Norbert Weissmann<sup>1</sup>, Werner Seeger<sup>1,2,4</sup>, Ralph T. Schermuly<sup>1,5</sup> and Tatyana Novoyatleva<sup>1,5</sup>

<sup>1</sup>Universities of Giessen and Marburg Lung Center (UGMLC), Excellence Cluster Cardio Pulmonary Institute (CPI), Member of the German Center for Lung Research (DZL), Justus-Liebig-University Giessen, Giessen, Germany. <sup>2</sup>Institute for Lung Health, Giessen, Germany. <sup>3</sup>Université Paris-Saclay, AP-HP, INSERM UMR\_S 999, Service de Pneumologie et Soins Intensifs Respiratoires, Hôpital de Bicêtre, Le Kremlin Bicêtre, France. <sup>4</sup>Max Planck Institute for Heart and Lung Research, Bad Nauheim, Germany. <sup>5</sup>These co-senior authors contributed equally to this work.

Corresponding author: Tatyana Novoyatleva ([tatyana.novoyatleva@innere.med.uni-giessen.de](mailto:tatyana.novoyatleva@innere.med.uni-giessen.de))

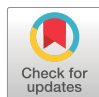

Shareable abstract (@ERSpublications)

Peptidyl-prolyl *cis/trans* isomerase, NIMA interacting 1 (Pin1) enzyme inhibition by Juglone administration reversed both hypoxia- and non-hypoxia-driven experimental PAH by improving pulmonary vascular remodelling and right ventricular function <https://bit.ly/3zWqTvb>

**Cite this article as:** Rai N, Sydykov A, Kojonazarov B, et al. Targeting peptidyl-prolyl isomerase 1 in experimental pulmonary arterial hypertension. *Eur Respir J* 2022; 60: 2101698 [DOI: 10.1183/13993003.01698-2021].

This single-page version can be shared freely online.

Copyright ©The authors 2022.

This version is distributed under the terms of the Creative Commons Attribution Non-Commercial Licence 4.0. For commercial reproduction rights and permissions contact [permissions@ersnet.org](mailto:permissions@ersnet.org)

Received: 19 Feb 2020  
Accepted: 29 Dec 2021

## Abstract

**Background** Pulmonary arterial hypertension (PAH) is a progressive disease characterised by pro-proliferative and anti-apoptotic phenotype in vascular cells, leading to pulmonary vascular remodelling and right heart failure. Peptidyl-prolyl *cis/trans* isomerase, NIMA interacting 1 (Pin1), a highly conserved enzyme, which binds to and catalyses the isomerisation of specific phosphorylated Ser/Thr-Pro motifs, acts as a molecular switch in multiple coordinated cellular processes. We hypothesised that Pin1 plays a substantial role in PAH, and its inhibition with a natural organic compound, Juglone, would reverse experimental pulmonary hypertension.

**Results** We demonstrated that the expression of Pin1 was markedly elevated in experimental pulmonary hypertension (i.e. hypoxia-induced mouse and Sugen/hypoxia-induced rat models) and pulmonary arterial smooth muscle cells of patients with clinical PAH. *In vitro* Pin1 inhibition by either Juglone treatment or short interfering RNA knockdown resulted in an induction of apoptosis and decrease in proliferation of human pulmonary vascular cells. Stimulation with growth factors induced Pin1 expression, while its inhibition reduced the activity of numerous PAH-related transcription factors, such as hypoxia-inducible factor (HIF)- $\alpha$  and signal transducer and activator of transcription (STAT). Juglone administration lowered pulmonary vascular resistance, enhanced right ventricular function, improved pulmonary vascular and cardiac remodelling in the Sugen/hypoxia rat model of PAH and the chronic hypoxia-induced pulmonary hypertension model in mice.

**Conclusion** Our study demonstrates that targeting of Pin1 with small molecule inhibitor, Juglone, might be an attractive future therapeutic strategy for PAH and right heart disease secondary to PAH.

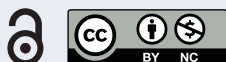

Supplement: inline-supplementary-material-2 [file inline-supplementary-material-2.pdf]
